# Supplementary material for: Cascade amplified colorimetric immunoassay based on an integrated multifunctional composite with catalytic coordination polymers for prostate specific antigen detection
Source: Royal Society of Chemistry journal article supplement (doi:10.1039/d0tb02104k), 2020-01-01
Supplement: d0tb02104k1.pdf [file d0tb02104k1.pdf]

## Supporting Information

### **Cascade amplified colorimetric immunoassay based on an integrated multifunctional composite with catalytic coordination polymer for prostate specific antigen detection**

Sixuan Wu, Caihong Wang, Jinhong Wang, Hongliang Tan\*

Key Laboratory of Chemical Biology of Jiangxi Province, College of Chemistry and Chemical  
Engineering, Jiangxi Normal University, Nanchang, 330022, China

\* E-mail: [hltan@jxnu.edu.cn](mailto:hltan@jxnu.edu.cn)

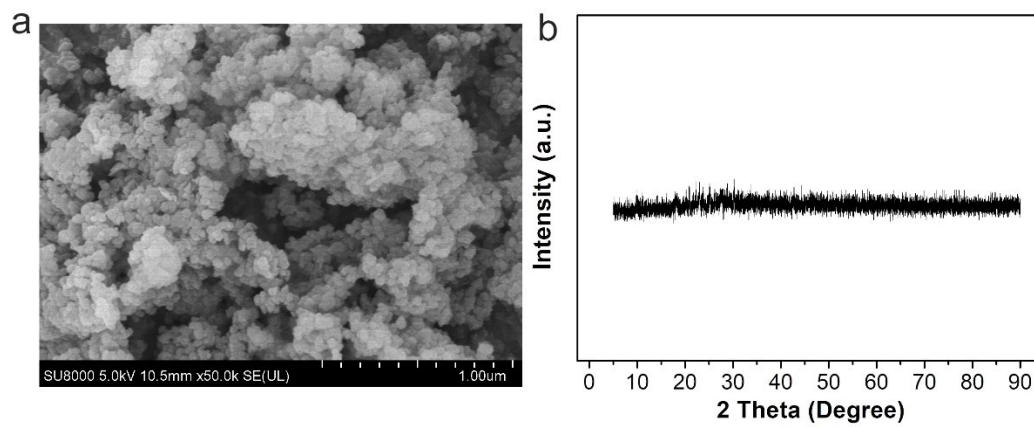

Figure S1. SEM image (a) and powder XRD pattern (b) of FeCPs.

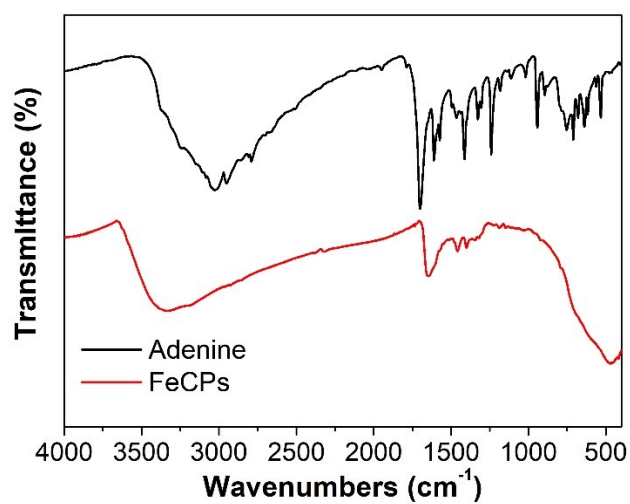

Figure S2. FTIR spectra of adenine and FeCPs.

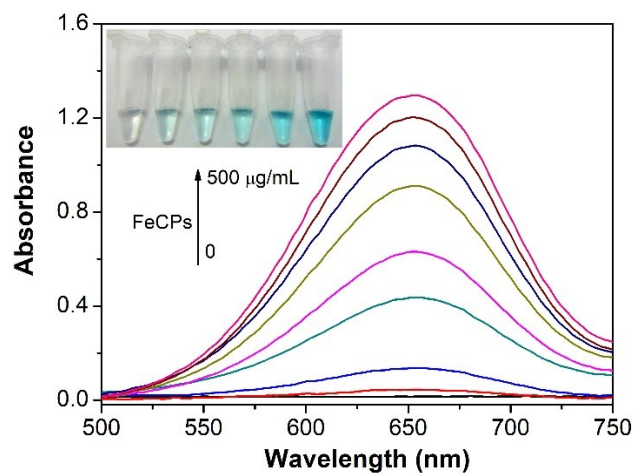

Figure S3. Absorption spectra of TMB solution in the presence of  $H_2O_2$  and FeCPs with different concentration (from 0 to 500  $\mu\text{g/mL}$ ).

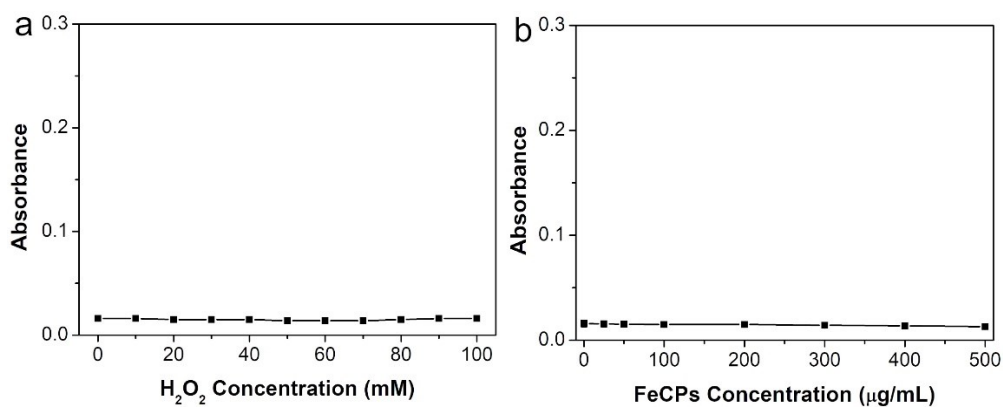

Figure S4. Effects of different concentrations of  $H_2O_2$  (a) and FeCPs (b) on the absorbance of TMB.

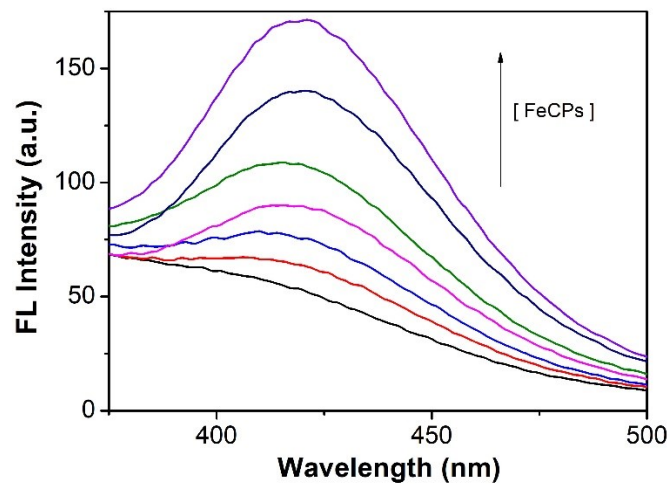

Figure S5. Emission spectra of terephthalic acid (TA) in the presence of  $\text{H}_2\text{O}_2$  (2 mM) and FeCPs with concentration from 0 to 20  $\mu\text{g/mL}$ .

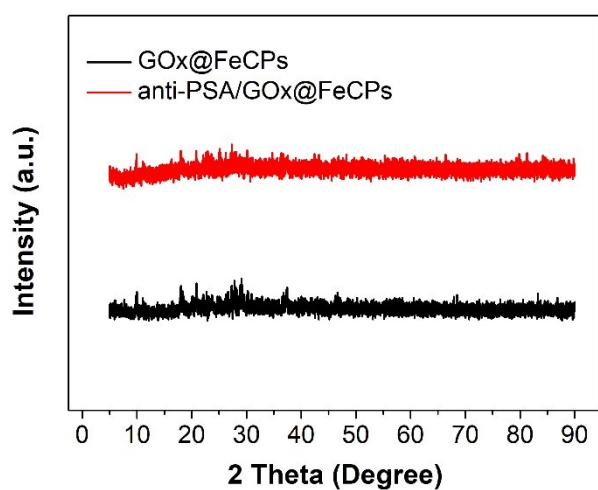

Figure S6. Powder XRD pattern of GOx@FeCPs and anti-PSA/GOx@FeCPs.

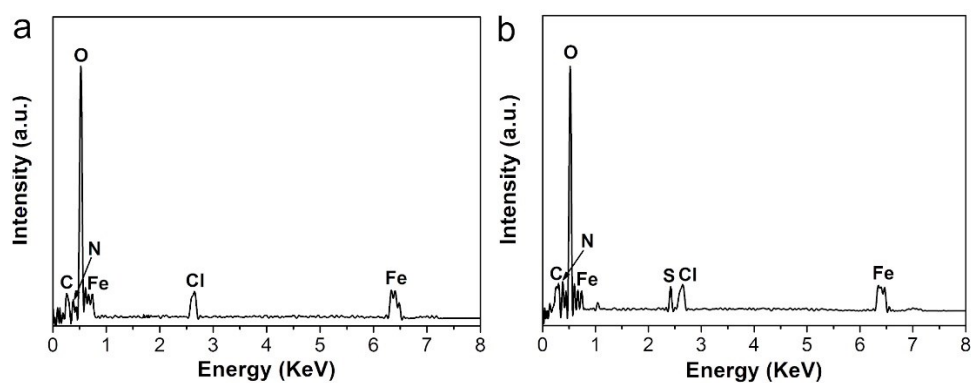

Figure S7. EDS spectra of FeCPs (a) and GOx@FeCPs (b).

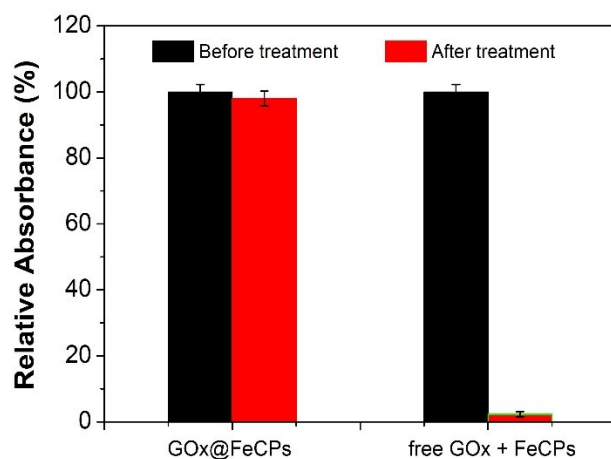

Figure S8. Relative absorbance of GOx@FeCPs and the mixture of free GOx and FeCPs before (black columns) and after (red columns) treating with excessive SDS.

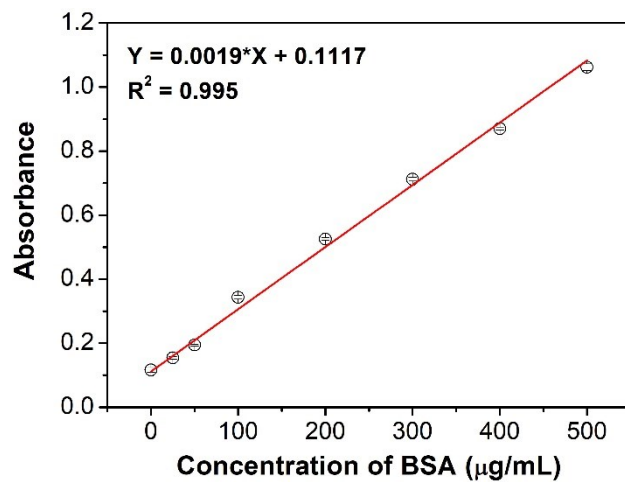

Figure S9. The calibration curve of the absorbance of BCA reagent at 560 nm as a function of BSA concentrations.

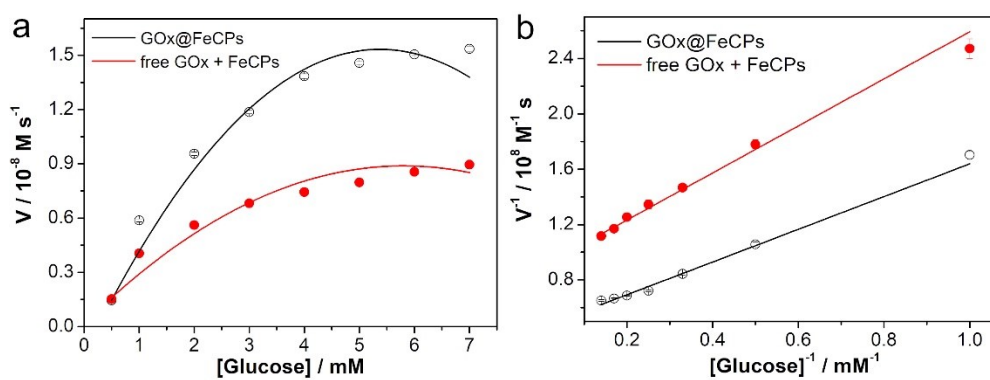

Figure S10. Steady-state kinetic assays (a) and double-reciprocal plots (b) of GOx@FeCPs and the mixture system of free GOx and FeCPs.

**Table S1.** Kinetic data for GOx@FeCPs and the mixture system of free GOx and FeCPs

| Catalyst         | Substrate | $K_m$ (mM) | $V_{max}$ ( $10^{-8} \text{ M s}^{-1}$ ) | $K_{cat}$ ( $\text{s}^{-1}$ ) |
|------------------|-----------|------------|------------------------------------------|-------------------------------|
| free GOx + FeCPs | Glucose   | 1.98       | 1.12                                     | 43.78                         |
| GOx@FeCPs        | Glucose   | 2.09       | 2.19                                     | 93.25                         |

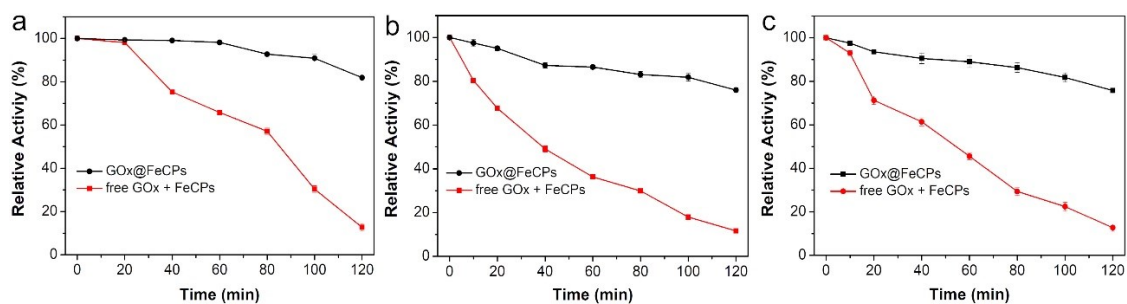

Figure S11. Relative activity of GOx@FeCPs and the mixture system of free GOx and FeCPs after treating for 120 min with 60 °C (a), 8 M urea (b) and 80% ethanol (c).

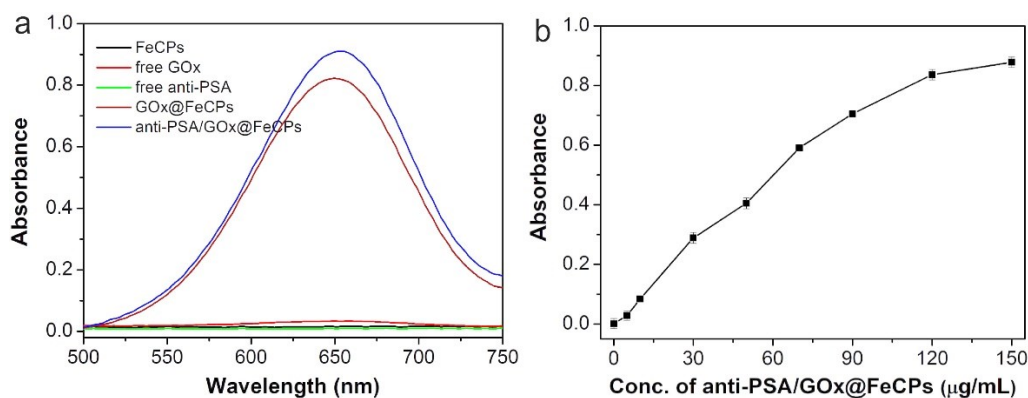

Figure S12. (a) Absorbance spectra of TMB solution with glucose in the presence of FeCPs, free GOx, free anti-PSA, GOx@FeCPs, or anti-PSA/GOx@FeCP. (b) Absorbance of TMB solution with glucose due to the immunoassay using different concentrations of anti-PSA/GOx@FeCPs as a detection antibody.

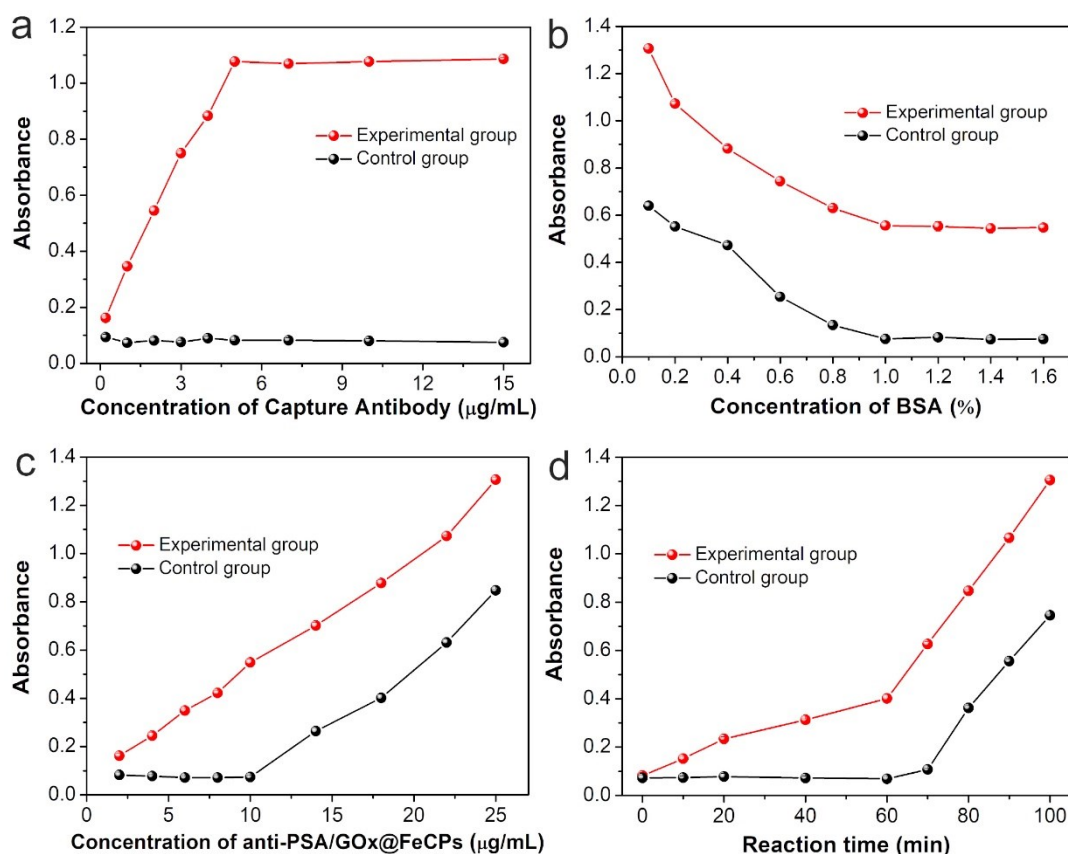

Figure S13. Effects of the concentrations of capture antibody (a), blocking agent BSA (b), anti-PSA/GOx@FeCPs (c), and reaction time (d) on the immunoassays with (red, as experimental group) and without (black, as control group) antigens.



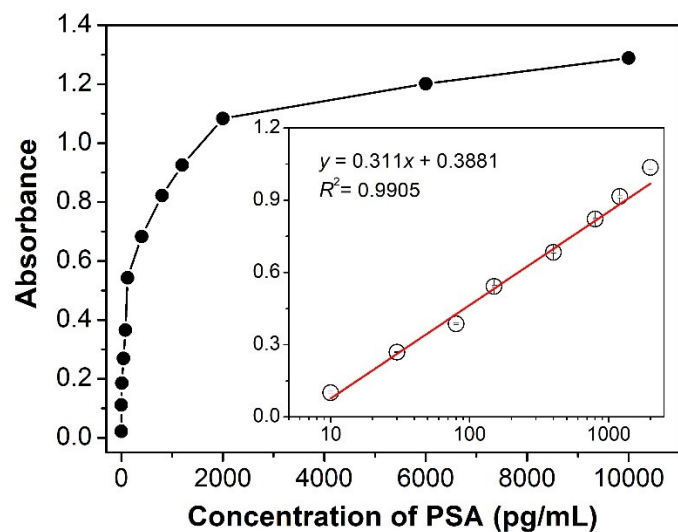

Figure S14. Absorbance of oxTMB at 650 nm produced in the immunoassays toward PSA at various concentrations (from 0 to 10000 pg/mL). Inset is the calibration curve of the absorbance of oxTMB versus PSA concentration (from 10 to 2000 pg/mL).

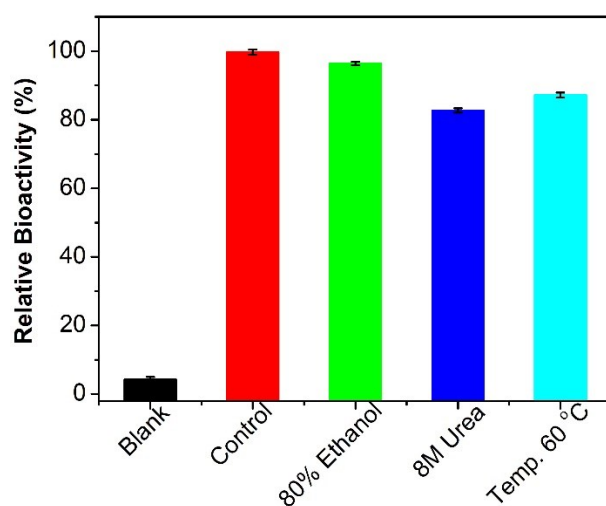

Figure S15. Relative bioactivity of anti-PSA/GOx@FeCPs after treating with for 120 min with high temperature (60 °C), 8 M urea and 80 % ethanol.

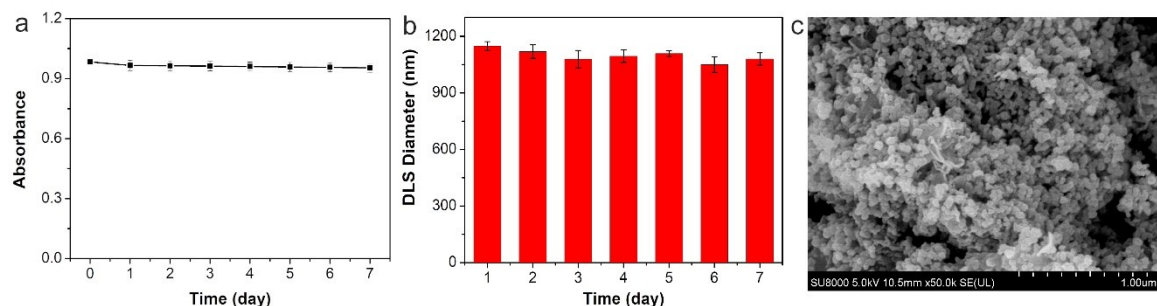

Figure S16. (a) Absorbance of oxTMB produced by immunoassay using the anti-PSA/GOx@FeCPs after keeping in HEPES buffer (100 mM, pH = 7.4) for 7 days at room temperature. The hydrodynamic diameters (b) and SEM image (c) of anti-PSA/GOx@FeCPs after keeping in HEPES buffer (100 mM, pH = 7.4) for 7 days at room temperature.

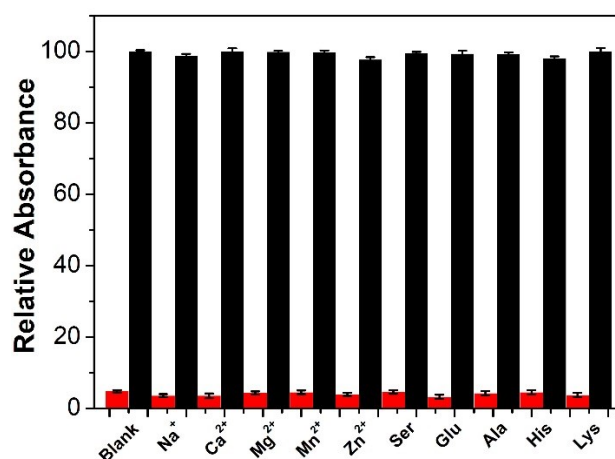

Figure S17. Effects of metal ions and biological species on the colorimetric immunoassay based on anti-PSA/GOx@FeCPs as a detection antibody. Black bars represent the addition of single interfering material (100 µM). Red bars represent the addition of the mixture of PSA (1500 pg/mL) and interfering materials (100 µM).

**Table S2.** Comparison of various colorimetric immunoassays for PSA detection.

| <b>Antibody labels</b>     | <b>Chromogenic reagent</b>       | <b>Linear range (pg/mL)</b> | <b>LOD (pg/mL)</b> | <b>Refs</b> |
|----------------------------|----------------------------------|-----------------------------|--------------------|-------------|
| Alkaline phosphatase (ALP) | TMB                              | 100 - 20 000                | 50                 | 1           |
| GOx coated AuNP            | Squaric acid                     | 1 - 30 000                  | 0.5                | 2           |
| AuNP@PtNP                  | TMB                              | 5 - 500                     | 2.9                | 3           |
| AgNP                       | TMB                              | 2 - 64                      | 0.165              | 4           |
| GOx-conjugated avidin      | KI/starch                        | 1 - $1 \times 10^6$         | 0.46               | 5           |
| ALP                        | Cu(I)-bicinchoninic acid complex | 0.5 - 25                    | 0.38               | 6           |
| anti-PSA/GOx@FeCPs         | TMB                              | 10 - 2000                   | 1.03               | This work   |

**Table S3.** Determination of PSA in serum sample

| <b>Added (pg/mL)</b> | <b>Detected (pg/mL)</b> | <b>Recovery (%)</b> | <b>RSD (n=3, %)</b> |
|----------------------|-------------------------|---------------------|---------------------|
| 5                    | 5.43                    | 108.56              | 1.59                |
| 450                  | 452.73                  | 100.61              | 2.38                |
| 900                  | 899.40                  | 99.93               | 1.12                |
| 1200                 | 1204.40                 | 100.37              | 1.45                |

## References

1. Z. Gao, L. Hou, M. Xu and D. Tang, *Sci. Rep.*, 2014, **4**, 3966.
2. W. Lai, D. Tang, J. Zhuang, G. Chen and H. Yang, *Anal. Chem.*, 2014, **86**, 5061-5068.
3. Z. Gao, M. Xu, M. Lu, G. Chen and D. Tang, *Biosens. Bioelectron.*, 2015, **70**, 194-201.
4. J. Li, Z. Gao, H. Ye, S. Wan, M. Pierce, D. Tang and X. Xia, *Chem. Commun.*, 2017, **53**, 9055-9058.
5. Y. Liu, L. Lei and Z. Zhang, *Sens. Actuators B-Chem.*, 2017, **248**, 195-200.
6. L. Lei, W. Xie, Z. Chen, Y. Jiang and Y. Liu, *Sens. Actuators B-Chem.*, 2018, **273**, 35-40.
